# Supplementary material
Source: PubMed Central journal article supplement (PMC6050098)
Supplement: NIHMS959278-supplement-3.pdf [file NIHMS959278-supplement-3.pdf]

## SUPPORTING INFORMATION LEGENDS

**Supplementary Data S1.** Raw data from our survey. **Tab 1.** All survey responses, including date of response. **Tab 2.** Survey responses from eligible respondents only (graduate students or postdoctoral fellows performing bench research). **Tab 3.** Extrapolated results from those who answered “other” to certain questions. **Tab 4.** Responses compiled in bar graphs.

**Supplementary Data S2.** All comments provided in the “free comments” section at the end of the survey.
